# Supplementary material for: Structural modeling and functional characterization of a novel gain-of-function TLR8 variant causing severe inflammatory syndrome
Source: JCI journal article supplement (doi:10.1172/jci.insight.187422), 2026-02-23
Supplement: sd1 [file 1]

# Supplemental material

1  
2  
3  
4  
5  
6  
7  
8  
9  
10  
11  
12  
13  
14  
15  
16  
17  
18  
19  
20  
21  
22  
23  
24

## **Structural modeling and functional characterization of a novel gain-of-function TLR8 variant causing severe inflammatory syndrome**

### **Supplemental Methods**

#### **Genetic test**

Next-generation sequencing (NGS) analysis was conducted using exome enrichment from DNA isolated from peripheral blood mononuclear cells (PBMCs) of the family members. Based on clinical information, our focus was formally directed towards genes including *ADA2*, *STING1*, *TNFAIP3*, *ARPC1B*, *NFKB1*, *SBDS*, *SRP54*, *EFL1*, *DNAJC21*, *C2orf69*, *CDC42* and *TLR8* as well as other genes relevant for differential diagnosis.

#### **X-chromosome inactivation analysis**

Peripheral blood mononuclear cells (PBMCs) were isolated from the mother by standard density gradient centrifugation. Genomic DNA was extracted and X-chromosome inactivation (XCI) patterns were assessed by quantitative fluorescent PCR (QF-PCR) analysis targeting two polymorphic, X-linked STR loci located in the androgen receptor gene (*AR*) and the retinitis pigmentosa 2 gene (*RP2*), respectively. These loci were chosen due to adjacent sites for the methylation-sensitive restriction enzyme *HpaII*, enabling discrimination of active and inactive X chromosomes. Following digestion with *HpaII*, QF-PCR amplification was performed with locus-specific primers and digested and undigested DNA samples, respectively (primer sequences available upon request). The relative amplification of each allele was quantified, and XCI ratios were calculated as the proportion of each allele's signal

25 compared to total. Ratios near 0.5 indicate random XCI, while deviations suggest skewing. The analysis  
26 was done at the Institute of Human Genetics, University Medical Center Hamburg-Eppendorf.

### 27 **Isolation and freezing of PBMCs**

28 Blood from study's subjects was drawn in EDTA tubes and the processing of the blood was initiated  
29 within 90 minutes after venipuncture. PBMCs were isolated using Lymphocyte Separation Medium  
30 (#LSM-A; Capricorn Scientific) density gradient centrifugation. Remaining erythrocytes were lysed in  
31 3 mL ACK Lysing Buffer (#A10492-01, Gibco) for 3 minutes. Isolated PBMCs were re-suspended in  
32 RPMI Medium 1640 supplemented with glutamine (#21875091, Gibco), 10% heat inactivated fetal  
33 bovine serum (FBS, # FBS-11A, Capricorn) and 1% penicillin, streptomycin. Freshly isolated PBMCs  
34 frozen in FBS with 10% DMSO (#D5879, Sigma-Aldrich) at -80 °C and then transferred the next day  
35 into liquid nitrogen.

### 36 **Immunophenotyping of PBMCs by multiparametric flow cytometry analyses**

37 Briefly, PBMCs were collected and washed once with warm PBS. Cells were resuspended in master  
38 mix solution containing PBS, the appropriate antibodies (listed in Supplemental Table 2) and the  
39 live/dead stain near infrared (NIR) dye and incubated at 4 °C in the dark for 30 minutes. After a washing  
40 step with 2% FBS in PBS, cells were fixed/permeabilized for intracellular staining, with 150 µL of BD  
41 Cytofix/Cytoperm™ Fixation/Permeabilization Kit (#554714, BD Biosciences) at 4 °C for 20 minutes  
42 in the dark. After a washing step with 1X BD Perm/Wash™ Buffer, cells were stained with intracellular  
43 antibodies for 30 minutes at 4 °C in the dark. After a washing step with 2% FBS in PBS, cells were  
44 resuspended in 200 µL 2% FBS in PBS. In some staining protocols, intracellular TLR8 staining was  
45 performed on fixed cells with 4% paraformaldehyde for 10 minutes at room temperature and  
46 permeabilized with 0.1% Triton X. For phosphoflow assays, cells were fixed in 4% paraformaldehyde  
47 for 10 minutes at room temperature, then resuspended in 100% cold methanol, and incubated for 30  
48 minutes on ice. Cells were then stained overnight with anti-pNF-κB p65 antibody (Ser536). Flow  
49 cytometry analysis was performed using a 5-laser Cytex Aurora Flow Cytometer (Cytex Biosciences).  
50 Resulting unmixed FCS files were analyzed with FlowJo v10.5 software (BD Life Sciences). Freshly

51 isolated blood was independently analyzed at the Institute of Immunology, University Medical Center  
52 Hamburg-Eppendorf, in order to quantify the absolute and relative cell population numbers.

### 53 **Stimulation of B cells**

54 Negative selection of B cells from PBMCs was conducted using the EasySep™ Human Pan-B Cell  
55 Enrichment Kit (#19554, StemCell). B cells were resuspended at a density of  $0,5 \times 10^5$  cells/ml in  
56 Iscove's Modified Dulbecco's Medium (IMDM, Gibco) containing 10% FBS (Gibco),  $50\mu\text{M}$   $\beta$ -  
57 Mercaptoethanol (Gibco), 2 mM L-Glutamine (Gibco), 1 mM Sodium-Pyruvate (Gibco), 0.1 mM  
58 NEAA (Gibco), 10 mM HEPES (Gibco), 100  $\mu\text{g/ml}$  streptomycin with 100 U/ml Penicillin (Gibco),  
59 100 U/ml IL-2 (Miltenyi Biotec), 0.05  $\mu\text{g/ml}$  IL-21 (Gibco). Stimulation of B cells was performed using  
60 the Human CD40-Ligand Multimer Kit by Miltenyi Biotec (#130-098-776, Miltenyi Biotec). Cells were  
61 seeded on a 24 well plate and incubated for 7 days at 37 °C, 5% CO<sub>2</sub>. B cells and supernatant were  
62 collected on day 0, 2, 4 and 7 for further analyses.

### 63 **Immunophenotyping of stimulated B cells**

64 B cells were washed with 0.2% BSA in PBS and incubated with 1 mg/ml purified human IgG (Jackson  
65 Immuno Research) at a dilution of 1:100 for 10 minutes at 4 °C. Afterwards, B cells were stained with  
66 fluorochrome-conjugated antibodies for 20 minutes at 4 °C and washed twice. The primary antibodies  
67 used for staining included: CD45-BV510 (HI30, Biolegend), CD19-BV785 (HIB19, Biolegend), CD38-  
68 FITC (HIT2, Biolegend), CD20-BB700 (2H7, BD Biosciences), CD27-PE (LG.3A10, Biolegend), IgD-  
69 APC (IA6-2, Biolegend). Dead cells were detected with Alexa Fluor 750 NHS Ester (#A20011,  
70 Invitrogen). Flow cytometry measurement was performed on BD FACS Symphony A1. Resulting  
71 unmixing FCS files were analyzed with FlowJo v10.5 software (BD Life Sciences).

### 72 **CD4+ T cell stimulation**

73 PBMCs were thawed in complete, pre-warmed medium of RPMI 1640 (#21875091, Gibco)  
74 supplemented with 10% FBS (Capricorn). Cells were washed and resuspended in autoMACS Running  
75 Buffer – MACS Separation Buffer (#130-091-221, Miltenyi Biotec). CD4+ T cells were negatively  
76 enriched from PBMCs using an EasySep™ Negative Human CD4 Kit (#19052, StemCell) following

77 manufacturer recommendations. CD4<sup>+</sup> T cells were subsequently counted and resuspended in a 96 well  
78 plate U-bottom in complete medium with either 100U/mL IL-2 (#200-02-500UG, Peprotech) only or  
79 activated with 100U/mL IL-2 plus 25µl/mL Immunocult CD3/CD28 (#10991, StemCell). Cells at  
80 baseline (Day0) and activated cells (Day3) were stained using the same protocol. Briefly, cells were  
81 resuspended in a master mix containing LIVE/DEAD™ Fixable Near-IR Dead (ThermoFisher) and  
82 the following antibodies antiCD3-BUV496 (clone UCHT1), antiCD27-BV661 (clone L128), antiCD4-  
83 BV785 (clone RPA-T4), antiCD8-R718 (clone HIT8), antiPD-1-BV605 (clone NAT105), and  
84 antiCXCR5-BV750 (clone RF8B2). The catalog number of the antibodies are listed in the Supplemental  
85 Table 2. Cells were incubated with the antibody mix for 20 minutes at room temperature, washed with  
86 autoMACS Running Buffer, fixed with 4% paraformaldehyde for 20 minutes at room temperature,  
87 washed and resuspended in autoMACS Running Buffer before flow cytometric acquisition. Flow  
88 cytometry analysis was performed using a 5-laser Cytex Aurora Flow Cytometer (Cytex Biosciences).  
89 Resulting unmixed FCS files were analyzed with FlowJo v10.5 software (BD Life Sciences).

#### 90 **CD14<sup>+</sup> isolation and RNA isolation for RNA sequencing**

91 CD14<sup>+</sup>CD16<sup>-</sup> monocytes were negatively isolated with EasySep™ Human Monocyte Enrichment Kit  
92 (#19059, StemCell), according to the manufacturer's protocol. Trizol-resuspended monocytes were  
93 thawed on ice and chloroform was added to extract the RNA from the cells. To precipitate the RNA,  
94 Zymo Research Direct-zol RNA Microprep extraction kit was used (#R2062, Zymo Research). RNA  
95 integrity was analyzed by applying a TapeStation High Sensitivity RNA ScreenTape assay (5067-5579,  
96 5067-5580, 5067-5581, Agilent). Per sample, 10 µl total RNA was Poly(A)-captured applying the  
97 Lexogen Poly(A) RNA Selection Kit and further processed via the RNA-Seq V2 Library Prep Kit with  
98 UDIs (#181.96, Lexogen) in the short insert size variant (RTM) according to the manufacturer's  
99 instructions (applying 15 cycles of Library Amplification PCR, step 4.3, User Guide version  
100 171UG394V0111).

101 Libraries were quality controlled on a TapeStation D5000 Assay (Agilent, D5000 ScreenTape 5067-  
102 5588 with D5000 Reagents 5067-5589) and were sequenced on an Element Biosciences AVITI  
103 instrument (2x75 Sequencing Kit Cloudbreak Freestyle Medium Output, # 860-00012) in a paired-end

104 mode (2 x 80 bp). After demultiplexing via bases2fastq, approximately 20 – 30 million read pairs  
105 assigned to each sample. All samples passed quality control and were subjected to downstream analysis.

### 106 **RNA-sequencing and differential gene expression analysis**

107 Alignment and quality control were performed using the NF-Core rnaseq (v.3.18.0) pipeline using the  
108 star-salomon aligner (1). Alignment was performed against the human genome assembly GRCH38 and  
109 Ensembl gene annotation v114. Unique molecular identifiers were used according to the library  
110 manufacturer's instructions. Differential gene expression analysis was performed using the NF-Core  
111 differential (v.1.5.0) pipeline (2). Enrichment was performed for up- and down-regulated genes  
112 separately using over-representation analysis implemented in the gseapy (v1.1.8) Python package (3).  
113 Differential gene expression results were filtered for the enrichment analysis using the thresholds:  
114 adjusted p-value  $\leq 0.05$  and  $\text{abs}(\log_2\text{FoldChange}) > 1$ . The Reactome Database (v2024), as provided  
115 by enrichR (<https://maayanlab.cloud/Enrichr/>), was used.

### 116 **Infection serology and autoantibodies analyses**

117 Serum analysis for antibodies against the vaccination status was performed at the Institute of Medical  
118 Microbiology, Virology and Hygiene, University Medical Center Hamburg-Eppendorf. Autoantibodies  
119 analysis was performed at the Institute of Immunology, University Medical Center Hamburg-Eppendorf.

### 120 **Plasma cytokine analyses**

121 Serum cytokines were measured using a LUMINEX multianalyte assay kit (Human XL Cytokine Fixed  
122 Panel; #LKTM014B, R&D Systems). The protocol was performed according to the manufacturer's  
123 instructions in a 96-well plate with 25  $\mu\text{l}$  of supernatant for cellular protein quantification. Protein  
124 quantification was done using the Bio-Plex-System 200 (Bio-Rad Laboratories GmbH) and the Bio-Plex  
125 Manager™ 4.1.1 software (Bio-Rad Laboratories GmbH), measured in mean fluorescence intensity  
126 (MFI). The MFI values were normalized using protein lysate concentrations measured according to the  
127 Bradford method. Serum IFN $\alpha$  and IFN $\beta$  levels were measured using VeriKine-HS Human IFN- $\alpha$  All  
128 Subtype ELISA Kit (#41115, PBL Assay Science) and VeriKine-HS™ Human Interferon Beta Serum  
129 ELISA Kit (#41415-1, PBL Assay Science), respectively, according to the manufacturer's instructions.

130 IFN $\lambda$  1/3 (IL-29/IL28B) was measured using Human IL-29/IL-28B (IFN-lambda 1/3) DuoSet ELISA  
131 (#DY1598B-05, R&D Systems). Cell supernatant IL-6 protein was measured using Human IL-6 DuoSet  
132 ELISA (#DY206-05, R&D Systems) and TNF protein was measured using Human TNF-alpha DuoSet  
133 ELISA (#DY210-05, R&D Systems). Absorbance was read at 450 nm with the Safire2™ microplate  
134 reader (TecanTechnologies). Supernatant of stimulated B cells was collected on day 0, 2, 4 and 7. IgG  
135 and IgM production was measured using the ELISA Flex Human IgG (#3850-1AD-6, Mabtech) and  
136 IgM (#3880-1AD-6, Mabtech) kit according to the manufacturer's instruction. Samples were measured  
137 with the PlateDirect A96 Plate Reader (Mettler Toledo) at 405 nm. A standard curve was run for each  
138 plate and the samples' concentrations were interpolated from them.

### 139 **RNA isolation for quantitative Real-Time PCR analyses**

140 Trizol-resuspended PBMCs were thawed on ice and chloroform was added to extract the RNA from the  
141 cells. After a centrifugation step, the aqua phase was loaded on the columns of RNeasy Mini Kit  
142 (#74104, Qiagen), following the manufacturer's instructions for RNA precipitation. Synthesis of cDNA  
143 was performed using the qScript™ cDNA Synthesis Kit kit (#95047-100, QuantaBiosciences) and  
144 qPCR was performed using the Quantifast SYBR Green supermix (#204154, Qiagen) in a LightCycler®  
145 96 System (Roche), according to the manufacturer's instructions. *HERC5*, *IFI6*, *IFI44*, *IFI44L*, *IFIT1*,  
146 *IFIT3*, *IFITM3*, *IL6*, *IRF5*, *IRF7*, *ISG15*, *MX1*, *MX2*, *RELA*, *OAS1*, *OAS2*, *OAS3*, *PLSCR1*, *STAT1*,  
147 *TLR8*, *TNFA* expression levels were measured by qPCR. The threshold cycle (Ct) was calculated using  
148 the mean of two technical duplicates and normalized to a stable housekeeping mRNA (*GAPDH*). All  
149 primer sequences used in the study are listed in Supplemental Table 3.

### 150 **Generation of BlaER1 *TLR8*<sup>-/-</sup> monocytes expressing the TLR8 protein**

151 BlaER1 *TLR8*<sup>-/-</sup> monocytes (2.5\*10<sup>6</sup> cells in total) were electroporated with PB\_(GOI),  
152 pCMV\_mcherry\_T2A\_Flag\_hyPBbase and PB\_rtTA plasmids in a 4:1:1 ratio (6  $\mu$ g in total) using a Gene  
153 Pulser device (BioRad) with the following settings: 265 V, 975  $\mu$ F, 720  $\Omega$ . The rtTA plasmid encodes  
154 the reverse tetracycline-controlled transactivator, which binds the doxycycline-responsive promoter and  
155 induces expression of TLR8 upon doxycycline treatment. Cell lines expressing TLR8 wild type or

156 indicated TLR8 point mutants were rested for 2 days after electroporation and selected with blasticidin  
157 (10 µg/ml, #A1113903, Thermo Scientific) and puromycin (2.5 µg/ml, #0240.4, Carl Roth).

### 158 **Generation of TLR8 variant plasmids**

159 Expression plasmids for wild type (WT) *TLR8* gene sequence (NM\_138636.5) or A518T, F494L (GOF),  
160 G572V (GOF) and D543A (LOF) were generated using a pcDNA3.1(+) backbone plasmid. For the  
161 experiments with the HA-tag immunoprecipitation, the HA-tagged oligo was introduced in the C-  
162 terminal region of the TLR8 protein after exclusion of the stop codon. All plasmids were purchased  
163 from GeneScript Biotech (Netherlands) B.V. Mutations were confirmed by full-plasmid sequencing  
164 (Microsynth AG, Switzerland).

### 165 **Secreted embryonic alkaline phosphatase (SEAP) assay**

166 Transfected HEK BN1 cells were used for the assay. Twenty-four hours post transfection, the cells were  
167 stimulated with either 100 ng/mL TL8-506 or 1 µg/mL CL097 for 24 hours. Cell culture supernatants  
168 were collected, and SEAP activity was quantified using the QUANTI-Blue™ detection reagent (#rep-  
169 qbs2, InvivoGen) following the manufacturer's protocol. Absorbance was measured at 620 nm using a  
170 Safire2™ microplate reader (Tecan Technologies). OD values from cells transfected with the empty  
171 vector were subtracted from the rest, and the final values normalized to WT.

### 172 **Cycloheximide chase and proteasomal inhibition assay**

173 Transfected HEK BN1 cells were used for the assay and 48 hours post-transfection, protein synthesis  
174 was inhibited using 50 µg/mL cycloheximide – CHX (#C4859, Sigma-Aldrich). TLR8 protein levels  
175 were detected upon 8 hours inhibition with or without cycloheximide by western blot.

176 For the proteasomal inhibition assay, transfected HEK293T cells were used for the assay and 48 hours  
177 post-transfection, treated for 6 hours with either cycloheximide (CHX, 50 µg/mL; #C4859, Sigma-  
178 Aldrich) to inhibit protein synthesis, MG132 (10 µM, #M7449-200UL, Merck) to block proteasomal  
179 degradation, or both. Following the treatment (mock, single, or combined), TLR8 protein levels and  
180 ubiquitination were analyzed by western blot in HA-immunoprecipitated lysates. Briefly, cells were  
181 washed with PBS on ice, centrifuged for 5 minutes (4 °C, 750 rcf) and lysed using RIPA buffer and

182 incubation on ice for 10 minutes. Following spin down for 10 minutes (4 °C, 14000 rcf), 20 µL of anti-  
183 HA Magnetic Beads (#88836, ThermoFisher) were added to each sample and incubated on a rotor  
184 overnight at 4 °C. After washing with PBS, pulled down lysates were reconstituted in Laemli buffer and  
185 used for western blotting.

## 186 **Protein analyses by western blot**

187 Cells were cultured as specified, washed with PBS and scraped off in ice-cold cell lysis RIPA-buffer  
188 supplemented with complete Mini Protease Inhibitors and PhosStop (Roche). Cell lysates were clarified  
189 by centrifugation (18,500 g, 10 minutes, 4 °C) and supernatants were supplemented with sample buffer.  
190 Proteins were separated on SDS-polyacrylamide gels and transferred to PVDF membranes using the  
191 Transblot Turbo Transfer System (Bio-Rad laboratories). Following blocking (20 mM Tris-HCl, pH  
192 7.4; 150 mM NaCl; 0.1% Tween-20; 5% non-fat dry milk) and washing (20 mM Tris-HCl, pH 7.4;  
193 150 mM NaCl; 0.1% Tween-20), membranes were incubated in primary antibody solution (20 mM Tris-  
194 HCl, pH 7.4; 150 mM NaCl; 0.1% Tween-20; 5% BSA or 5% non-fat dry milk) containing the  
195 appropriate antibodies: TLR8 (D3Z6J) (#11886S, Cell Signaling, 1:1000 dilution), phospho-NF-κB p65  
196 (Ser536) (#3033S, Cell Signaling, 1:1000 dilution), total-NF-κB p65 (#sc-8008, Santa Cruz, 1:200  
197 dilution), ubiquitin (#19247, abcam, 1:1000 dilution) and HA-Peroxidase (#12013819001, Roche,  
198 1:10000 dilution).  $\gamma$ -tubulin (#ab179503, abcam, 1:2000 dilution) and lactate dehydrogenase (LDHA,  
199 #2012, Cell Signaling, 1:1000 dilution) were used as housekeepers. Membranes were washed and  
200 incubated with donkey anti-rabbit IgG Horseradish Peroxidase secondary antibody (GE Healthcare;  
201 #NA934V; 1:7500 dilution) or with sheep anti-mouse IgG Horseradish Peroxidase secondary antibody  
202 (GE Healthcare; #NA931V, 1:7500 dilution). After final washing, proteins were visualized using the  
203 ChemiDoc MP Imaging System (Bio-Rad laboratories).

204 **References**

205 1. Patel H, et al. nf-core/rnaseq: nf-core/rnaseq v3.18.0 - Lithium Lynx. 2024.

206 <https://doi.org/10.5281/zenodo.14537300>.

207 2. WackerO, et al. nf-core/differentialabundance: v1.4.0 - 2023-11-27. 2023.

208 <https://doi.org/10.5281/zenodo.10209675>.

209 3. Fang Z, Liu X, Peltz G. GSEAPy: a comprehensive package for performing gene set enrichment  
210 analysis in Python. *Bioinformatics*. 2023;39(1):btac757.

211

212 Supplemental Figures

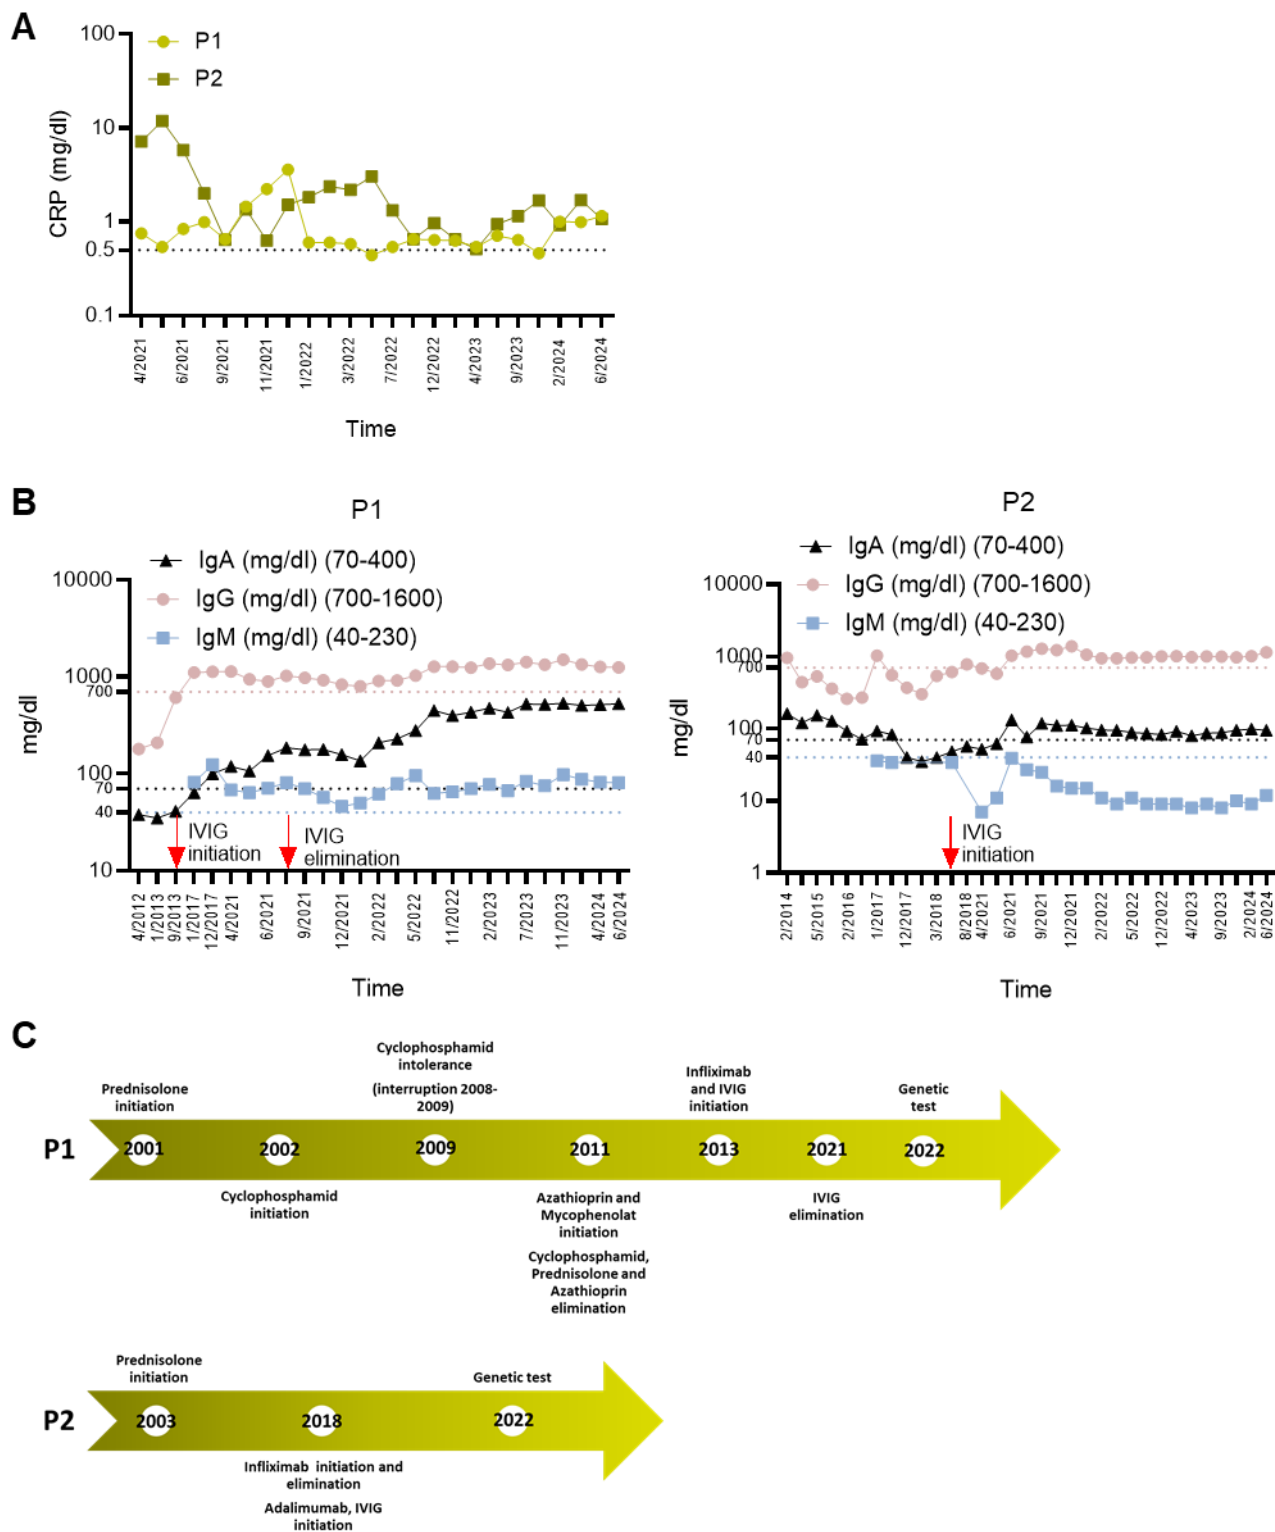

213 Supplemental Figure 1. Clinical parameter of the affected siblings

214 (A) Time course of CRP measurements for P1 and P2 individuals. (B) Time course of IgA/G/M  
215 immunoglobulins of P1 and P2 individuals in relation to the IVIG medication. (C) Overview of the  
216 therapeutic scheme of the P1 and P2 individuals.

△ Healthy males <30y    ▲ Healthy females >40y    ● Family members

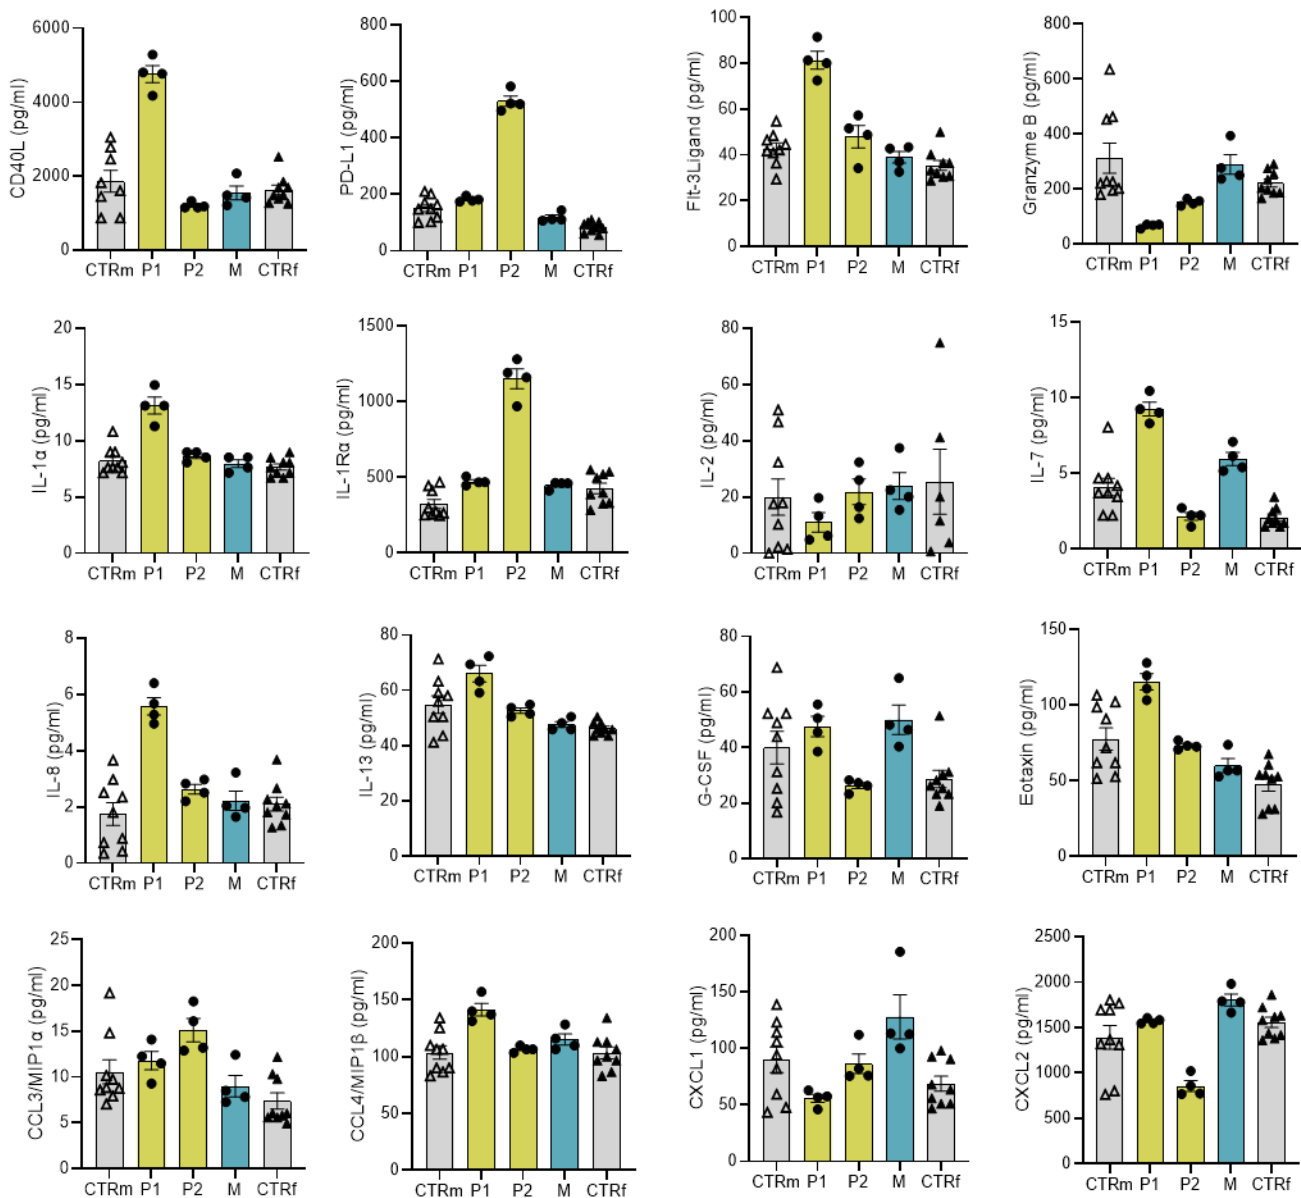

217 **Supplemental Figure 2. Plasma cytokine profile in siblings with the TLR8 A518T variant**

218 Plasma analysis of several pro-inflammatory cytokines, growth factors, and chemokines in family  
 219 members (P1, P2, and M; performed in quadruplets) compared with healthy male individuals <30 years  
 220 old ( $n = 3$ , performed in triplicates) and healthy female individuals >40 years old ( $n = 3-4$ , performed in  
 221 triplicates). Data represent mean  $\pm$  SEM.

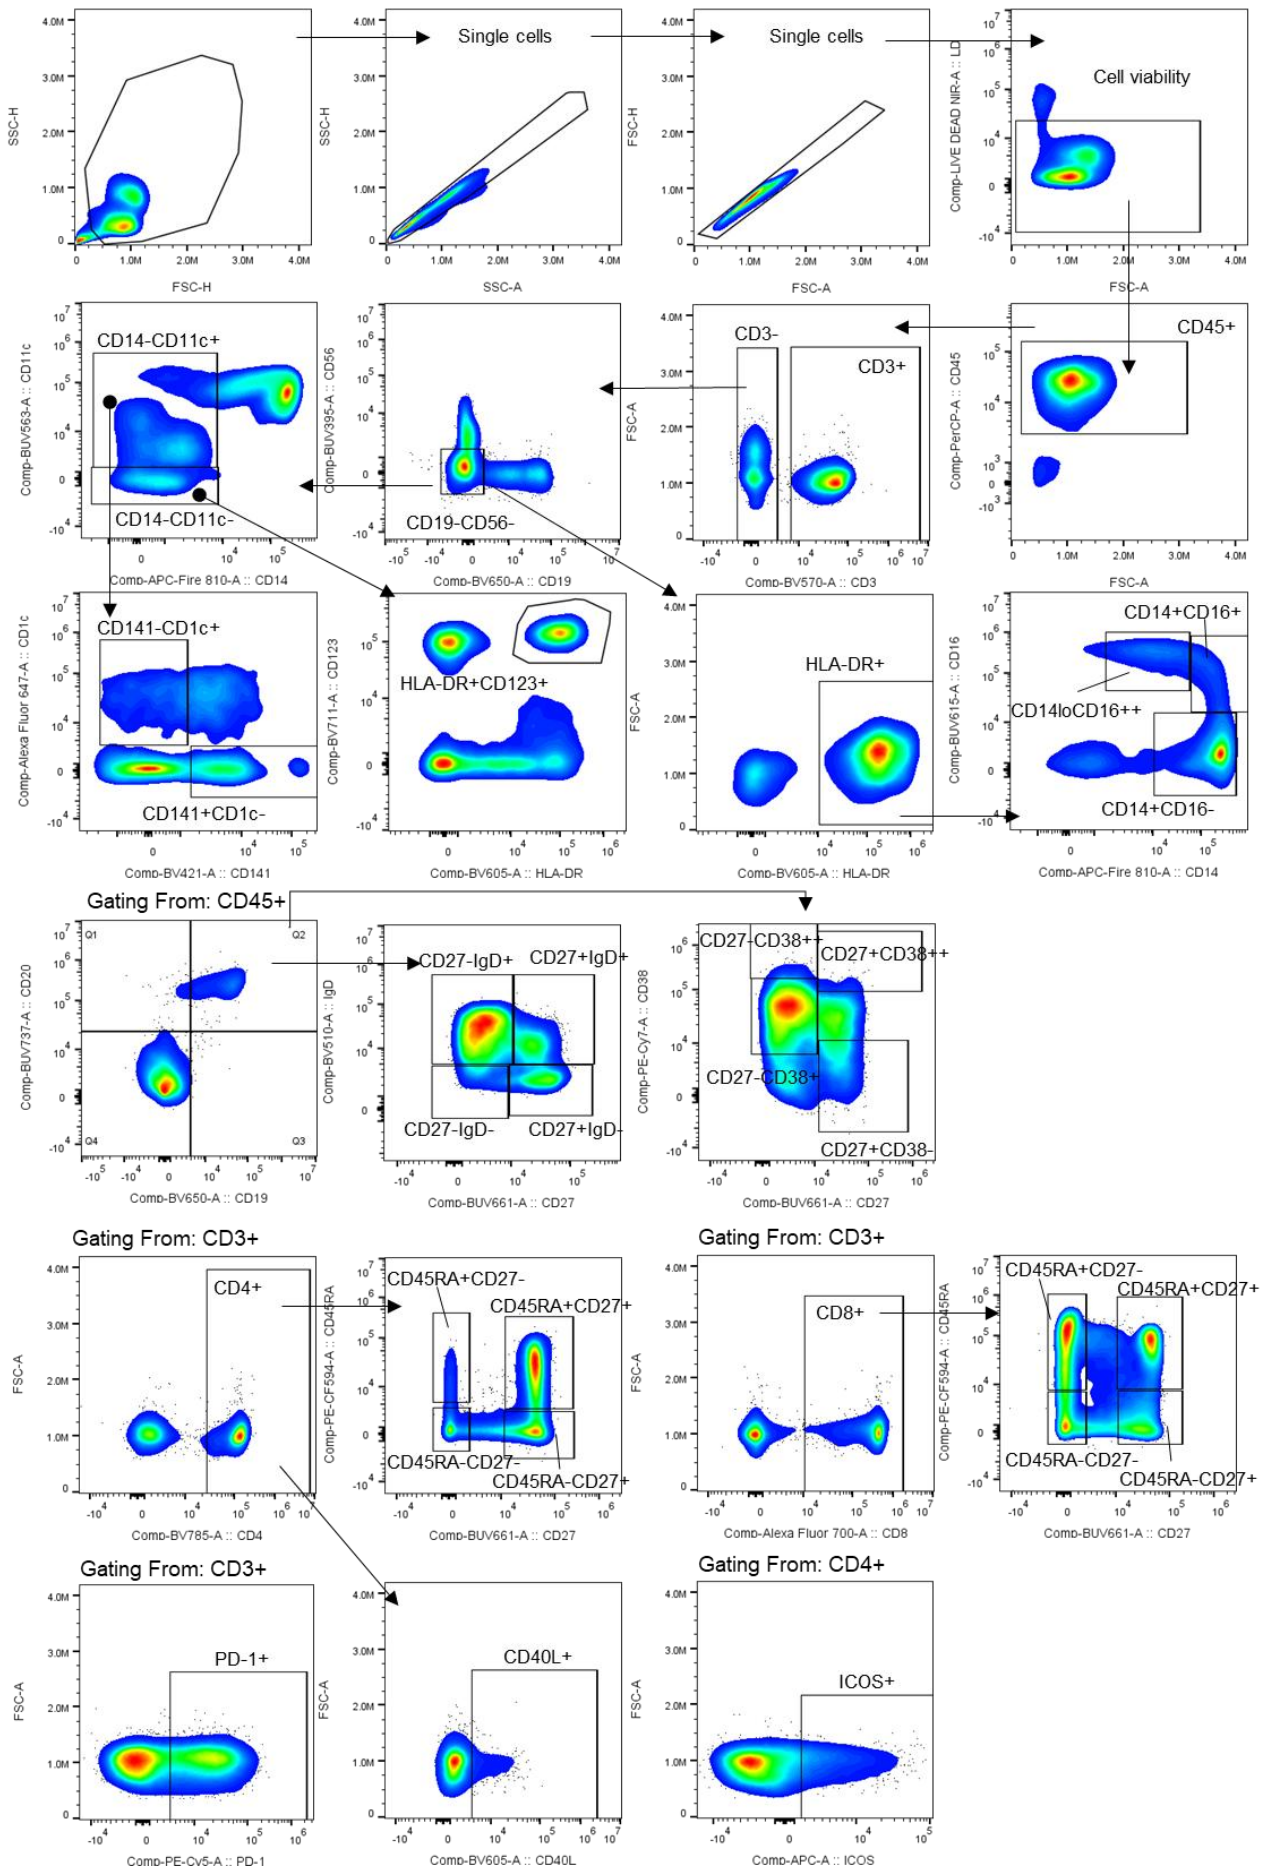

222 **Supplemental Figure 3. Gating strategy for multiparametric flow cytometry analysis.**

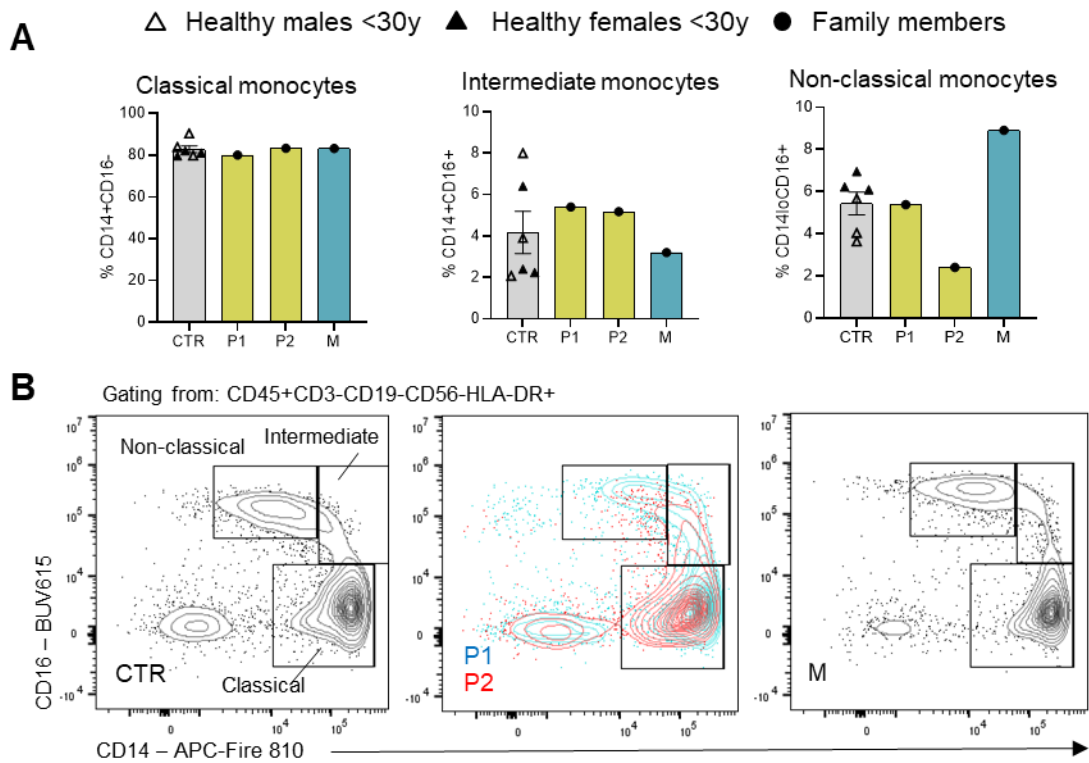

223 **Supplemental Figure 4. Immunological findings in monocytes**

224 (A) Percentage of classical, intermediate and non-classical monocytes in family members relative to  
 225 healthy male ( $n = 3$ ) and female ( $n = 3$ ) individuals (CTR). Data represent mean  $\pm$  SEM for healthy  
 226 controls. (B) Representative flow cytometry plots of monocyte populations in family members relative  
 227 to healthy male ( $n = 3$ ) and female ( $n = 3$ ) individuals (CTR).

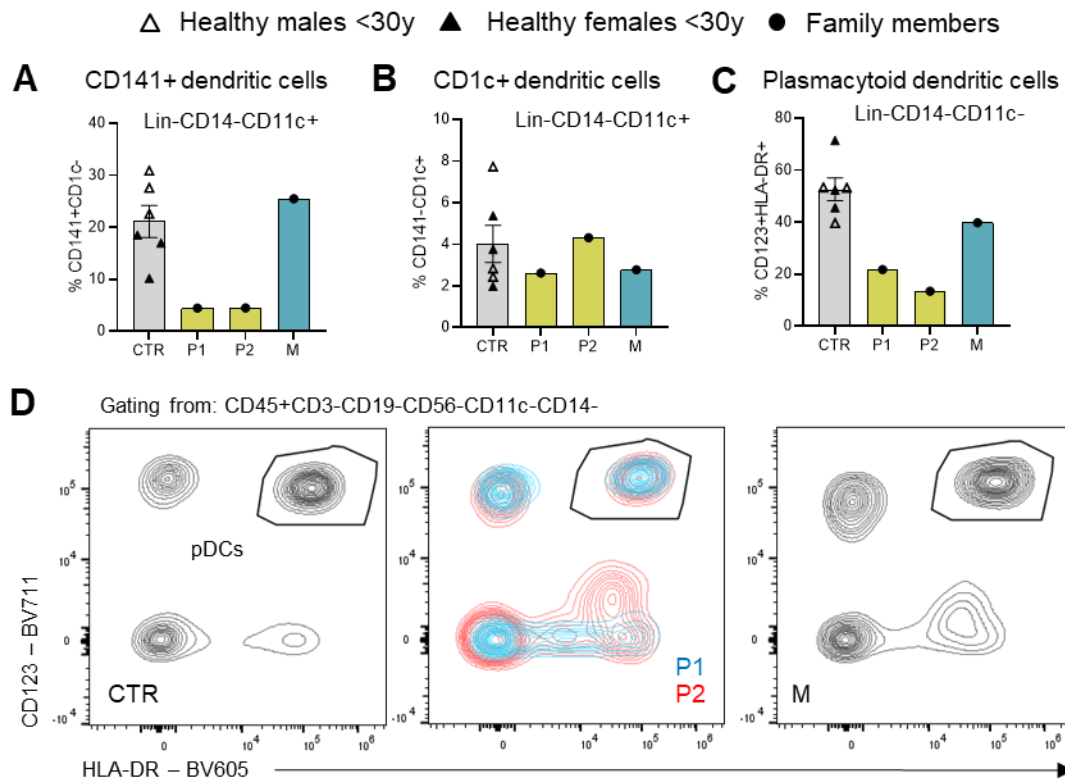

228 **Supplemental Figure 5. Immunological findings in dendritic cells**

229 (A-B) Percentages of CD141+ and CD1c+ dendritic cells in family members compared to healthy male  
 230 ( $n = 3$ ) and female ( $n = 3$ ) individuals (CTR). Data represent mean  $\pm$  SEM for healthy controls. (C-D)  
 231 Percentage and the representative flow cytometry plots of plasmacytoid dendritic cells in family  
 232 members relative to healthy male ( $n = 3$ ) and female ( $n = 3$ ) individuals (CTR). Data represent  
 233 mean  $\pm$  SEM for healthy controls.

△ Healthy males <30y ▲ Healthy females <30y ● Family members

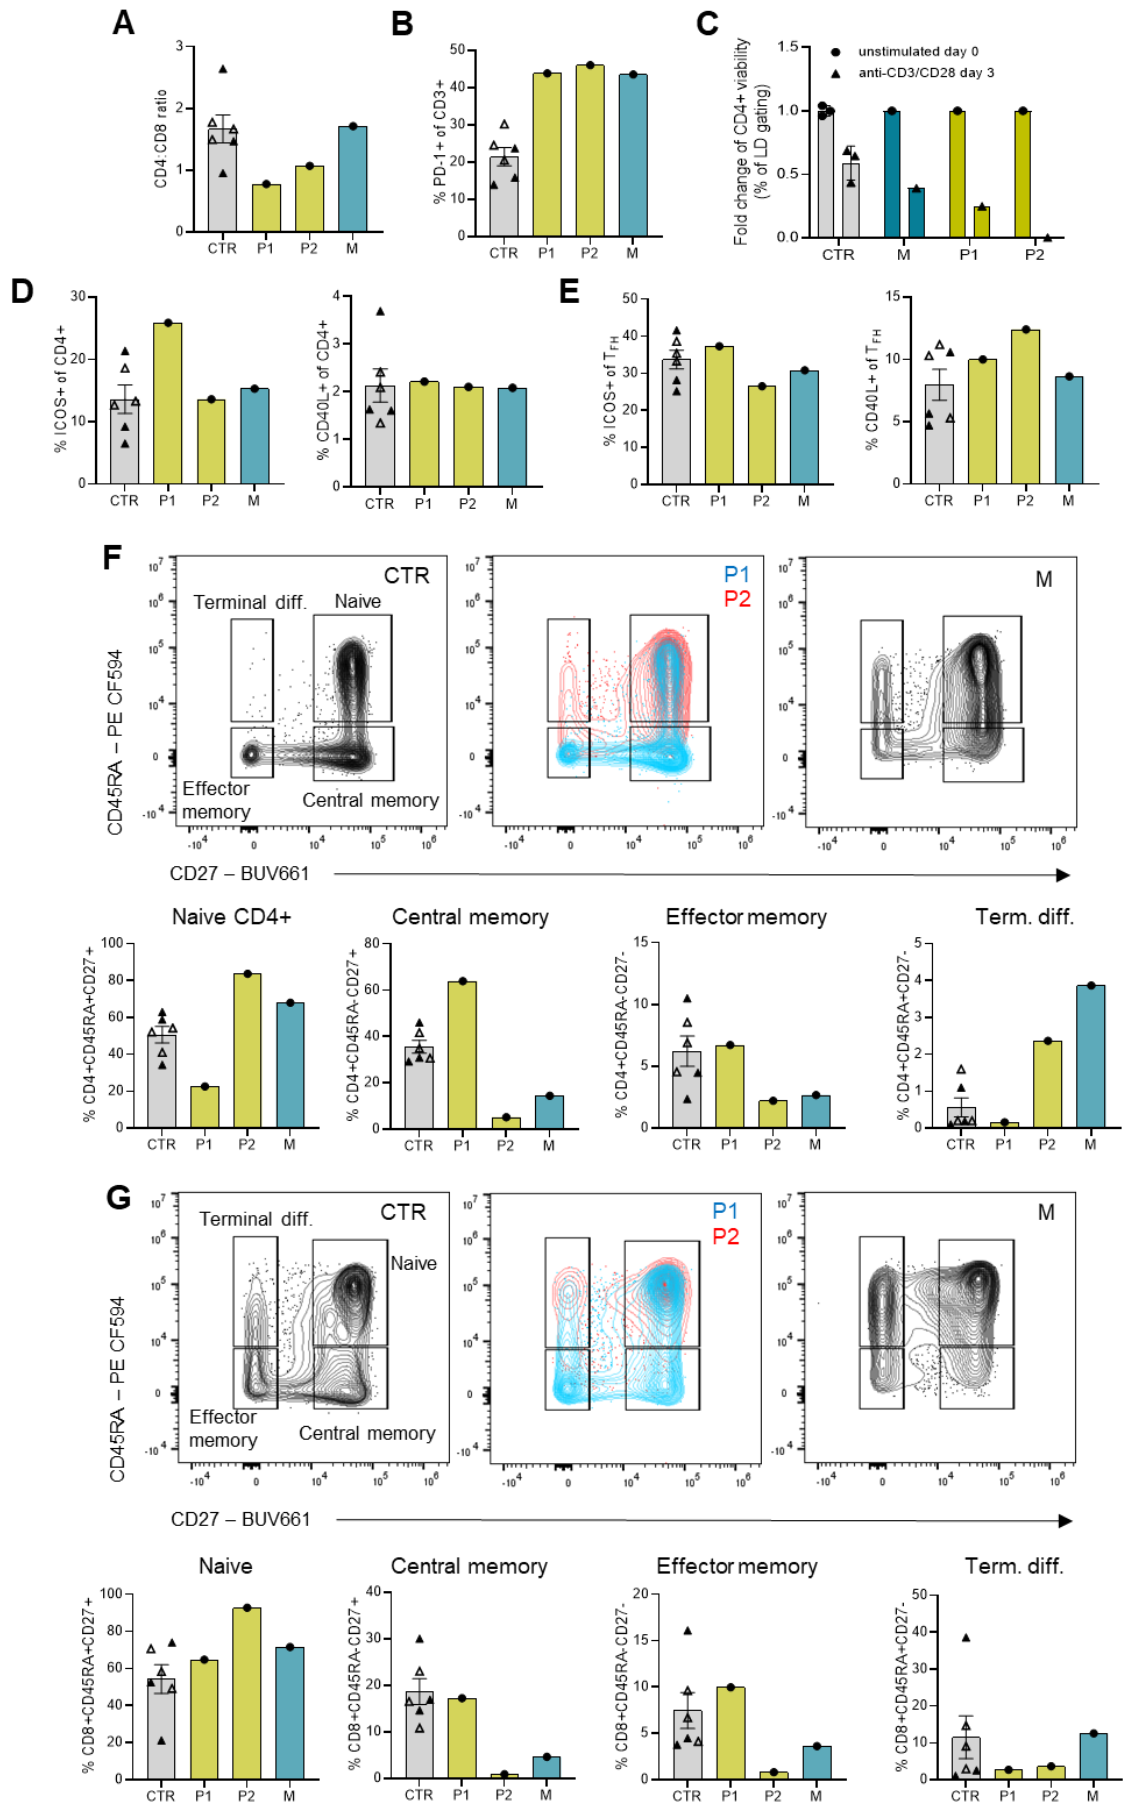

235 (A) CD4:CD8 ratio in family members relative to healthy male ( $n = 3$ ) and female ( $n = 3$ ) individuals  
236 (CTR). (B) Percentage of exhausted CD3+PD-1+ T cells in family members relative to healthy male ( $n$   
237 = 3) and female ( $n = 3$ ) individuals (CTR). (C) CD4+ cells viability upon stimulation of isolated T cells  
238 with ImmunoCult Human CD3/CD28 T cell activator for 3 days. The data are presented as fold change  
239 from the unstimulated day 0 for each donor. (D-E) Percentages of the surface markers ICOS and CD40L  
240 of PD1+CXCR5+ T<sub>FH</sub> and CD4+ T cells in family members relative to healthy male ( $n = 3$ ) and female  
241 ( $n = 3$ ) individuals (CTR). (F-G) Representative flow cytometry plots of CD4 and CD8 populations,  
242 along with their frequencies, in family members relative to healthy male ( $n = 3$ ) and female ( $n = 3$ )  
243 individuals (CTR). Data represent mean  $\pm$  SEM for healthy controls.

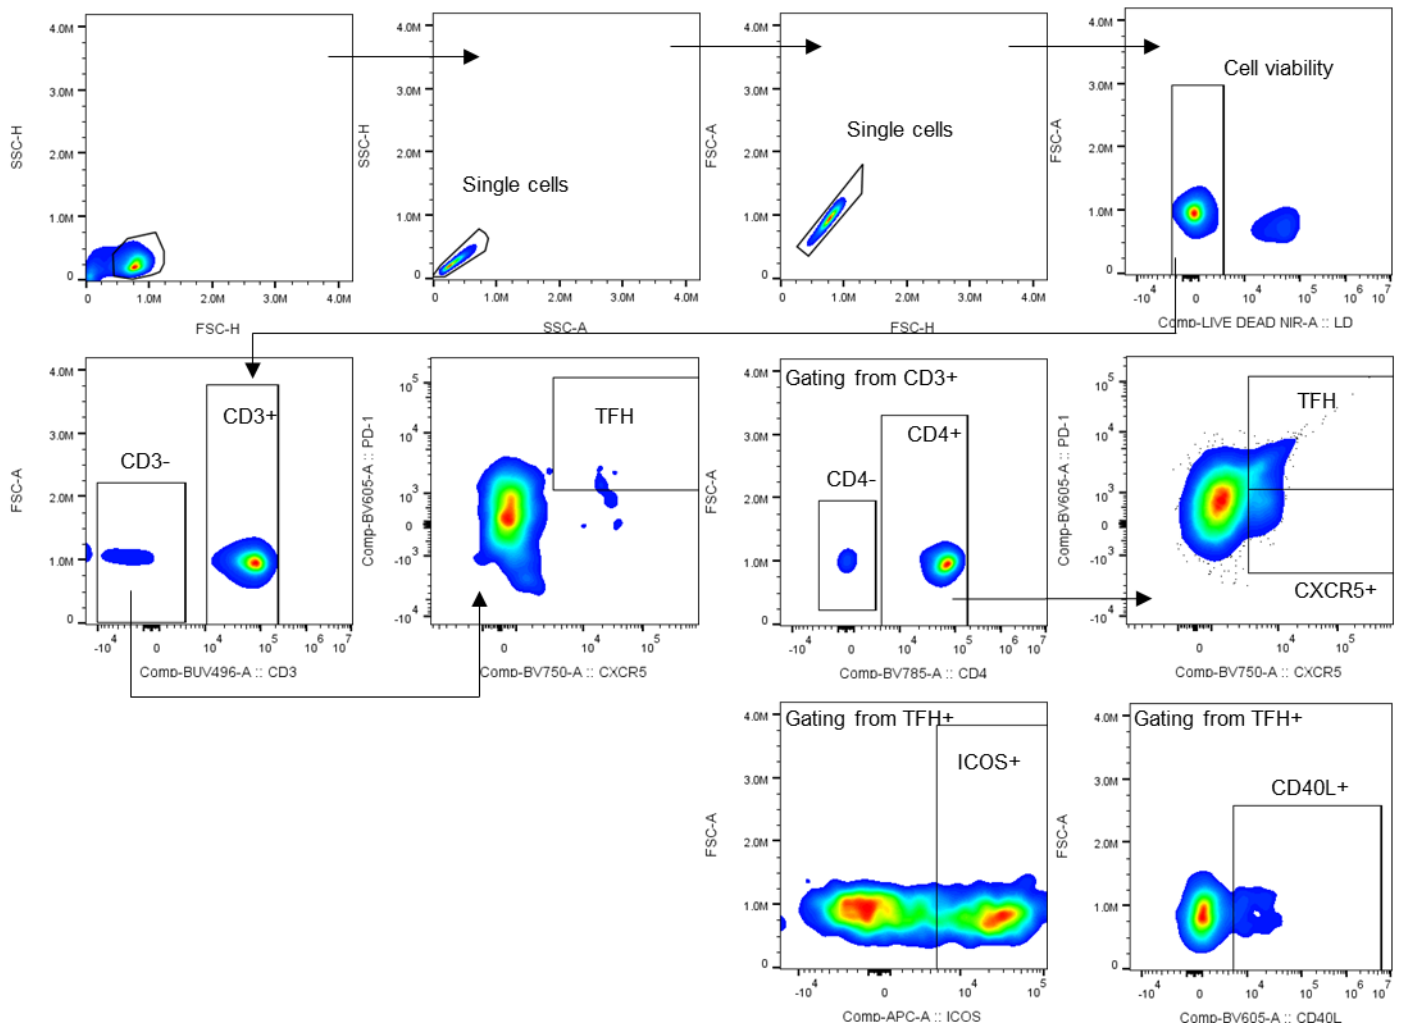

244 **Supplemental Figure 7. Gating strategy of T<sub>FH</sub> cells**

245 Positively selected CD4<sup>+</sup> cells were stained for CXCR5<sup>+</sup>PD-1<sup>+</sup> T<sub>FH</sub> cells. As a control for gating was

246 used the CXCR5<sup>+</sup>PD-1<sup>-</sup> cells in CD3<sup>-</sup> cells.

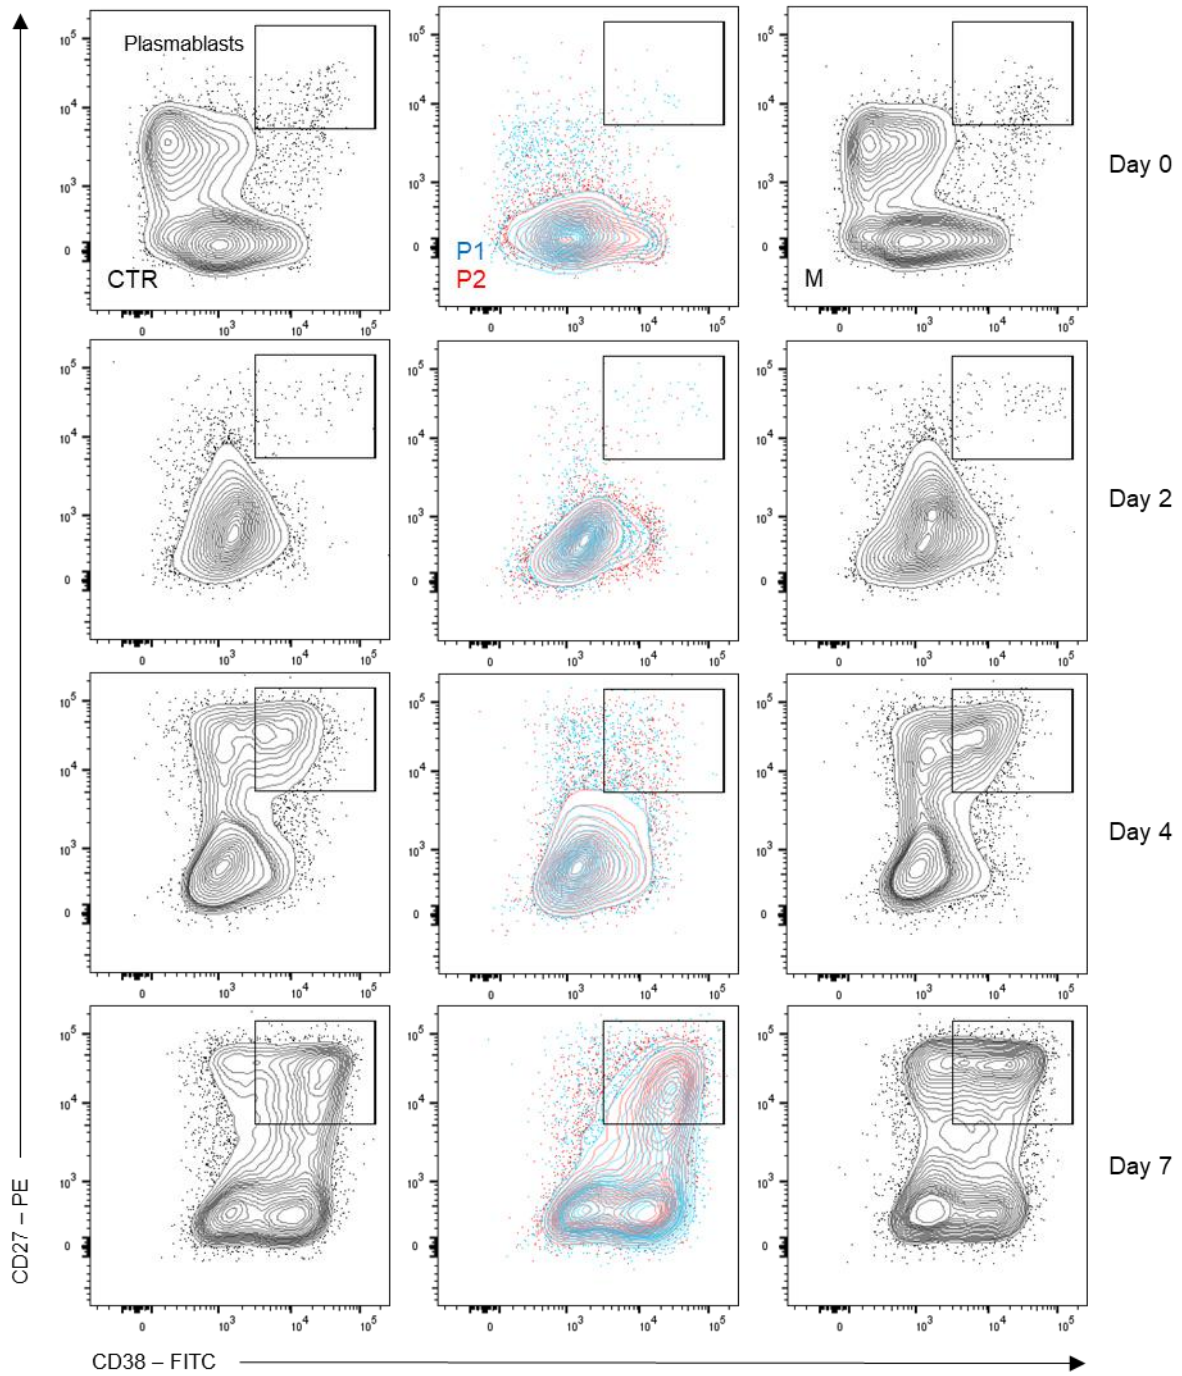

247

248 **Supplemental Figure 8. Gating for CD27+CD38++ plasmablasts**

249 Representative flow cytometry plots of isolated B cells upon stimulation with CD40L and stained for

250 plasmablasts over time in family members (P1, P2 and M) and healthy male individuals (CTR).

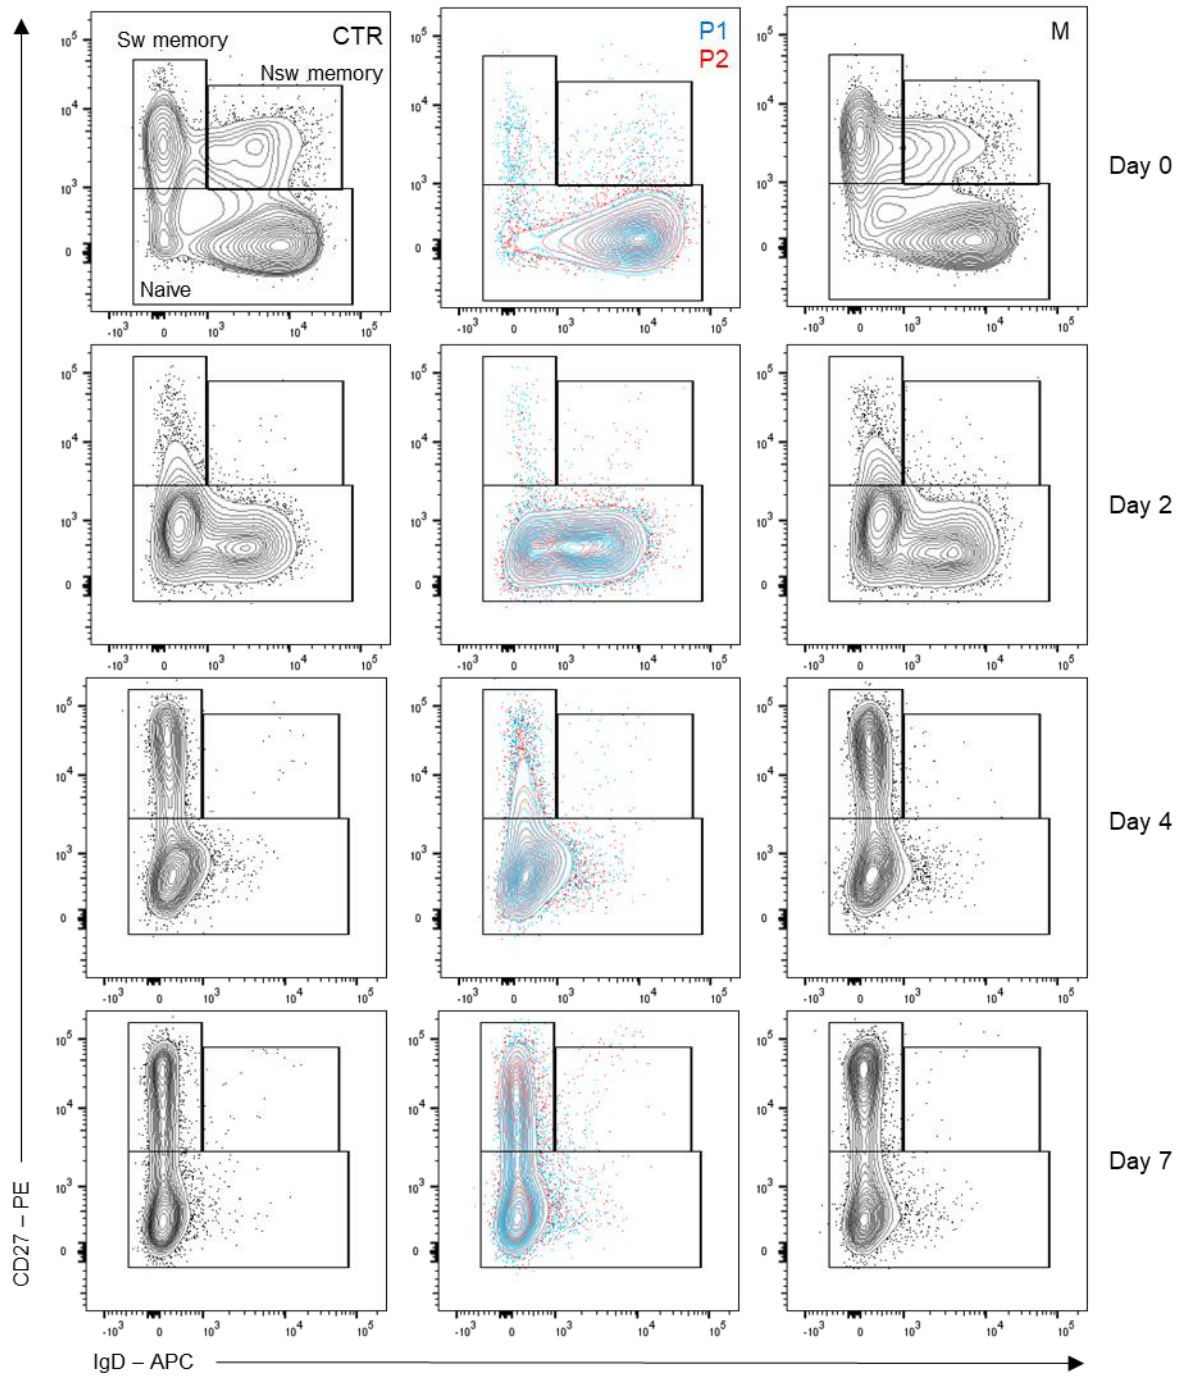

251 **Supplemental Figure 9. Gating for switched memory (sw), non-switched memory (nsw) and naive**  
 252 **B cells.**  
 253 Representative flow cytometry plots of isolated B cells upon stimulation with CD40L and stained for  
 254 sw, nsw memory and naive B cells over time in family members (P1, P2 and M) and healthy male  
 255 individuals (CTR).

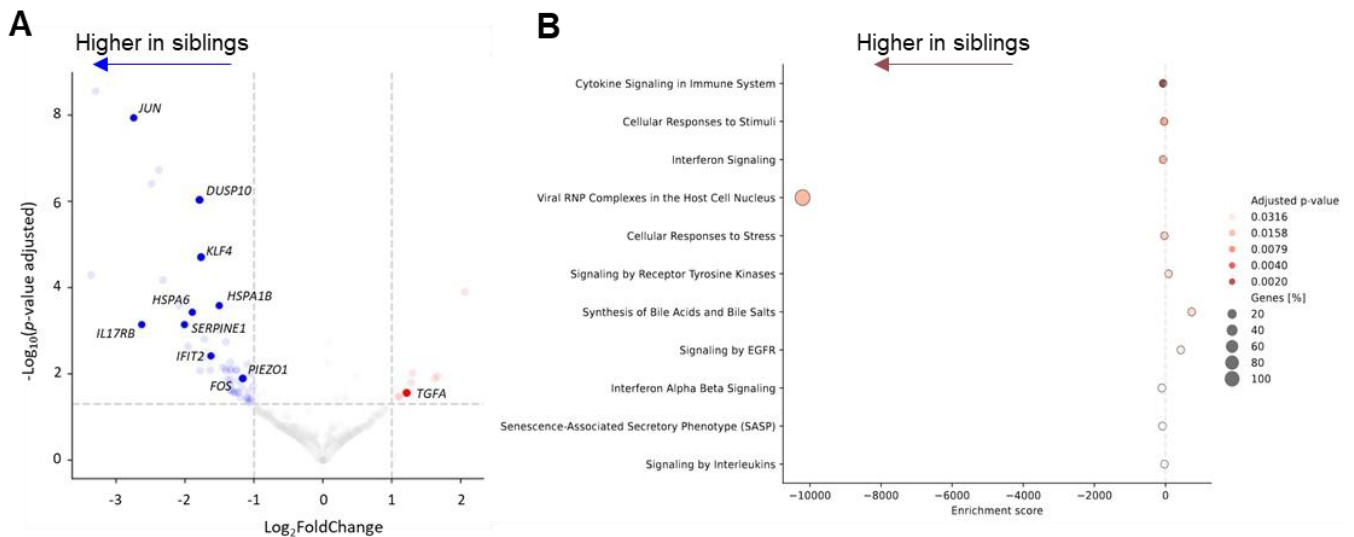

256 **Supplemental Figure 10. Enhanced cytokine and interferon signaling in monocytes from the**  
 257 **siblings with the TLR8 A518T variant upon stimulation**

258 (A) Volcano plot showing differentially expressed genes in enriched CD14+CD16- monocytes  
 259 stimulated with 1 μg/mL TL8-506 for 4 hours. Monocytes were isolated from healthy male controls (*n*  
 260 = 4) and compared to those from the two siblings (P1 and P2). Genes with significant upregulation and  
 261 downregulation are highlighted based on adjusted *P*-values and fold change thresholds, illustrating  
 262 transcriptional differences in response to TLR8 stimulation. (B) Bubble plot representing the top  
 263 enriched pathways identified from the differentially expressed genes. Bubble size corresponds to the  
 264 percentage of genes involved, and color intensity reflects the significance of pathway enrichment.

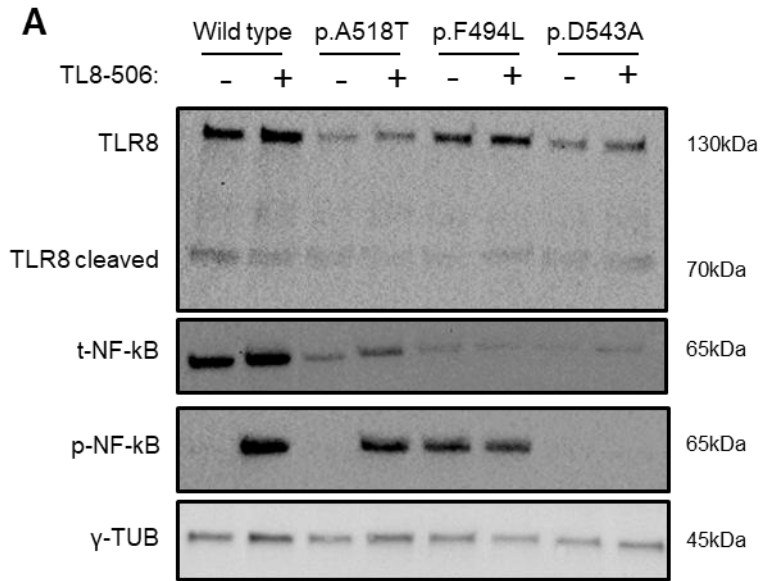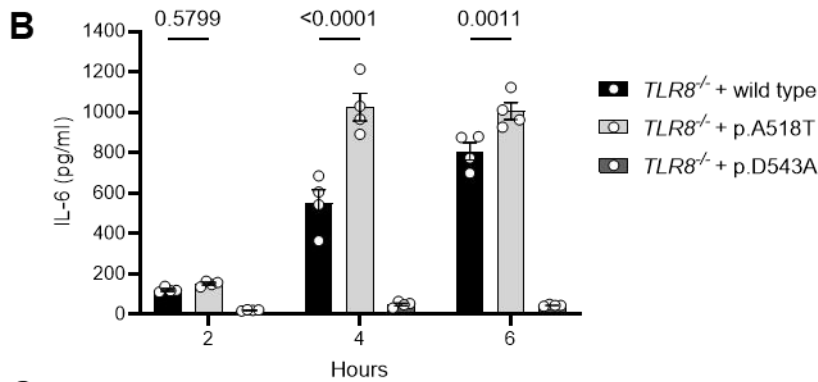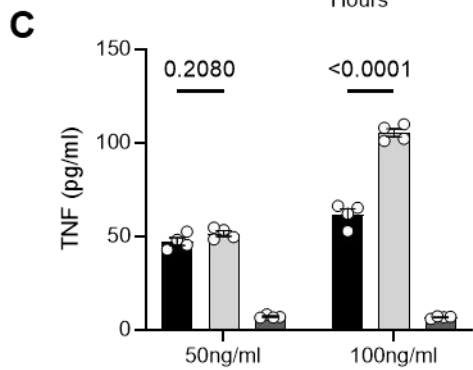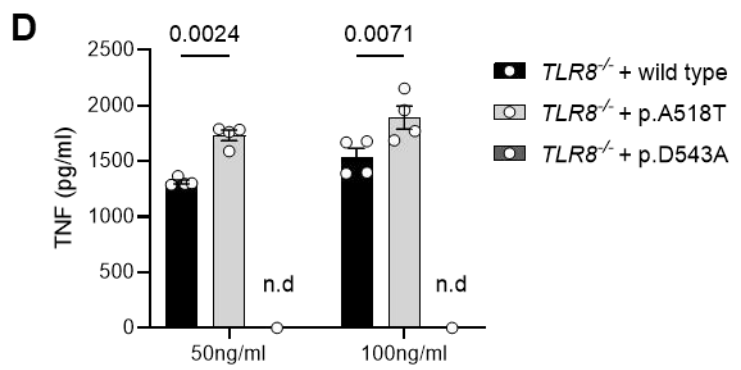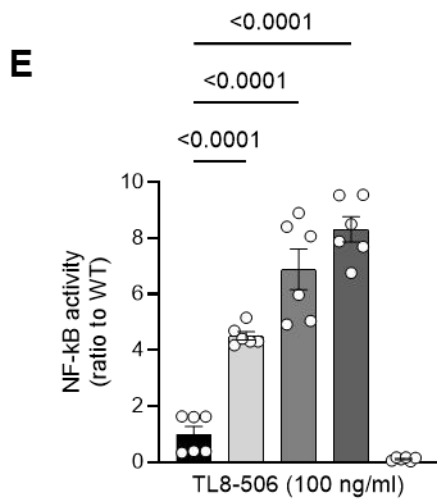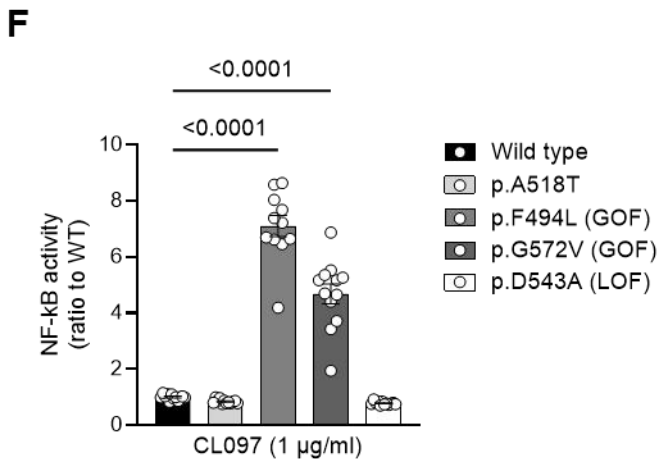

266 **Supplemental Figure 11. Increased NF- $\kappa$ B activation and cytokine production in cells expressing**  
267 **the TLR8 A518T variant upon stimulation**

268 (A) Western blot against TLR8, pNF- $\kappa$ B, total NF- $\kappa$ B and  $\gamma$ -TUB in BlaER1 *TLR8*<sup>-/-</sup> cells with the  
269 insertion of the TLR8 wild type protein, or the p.A518T, and the previously published p. F494L (GOF)  
270 or p.D543A (LOF) TLR8 variants. Cells are stimulated with 100 ng/ml TL8-506 agonist for 15 minutes.  
271 (B) IL-6 quantification of BlaER1 *TLR8*<sup>-/-</sup> cells with the insertion of the TLR8 wild type protein, or the  
272 p.A518T and p.D543A (LOF) variants. Cells were stimulated with 100 ng/ml TL8-506 TLR8 agonist at  
273 different time points. Data are presented after the subtraction of the unstimulated measurements.  
274 Statistical significance between groups was assessed using a two-way ANOVA multiple comparison  
275 test. Data represent mean  $\pm$  SEM of  $n = 4$  experiments. (C-D) TNF quantification of BlaER1 *TLR8*<sup>-/-</sup>  
276 cells with the insertion of the TLR8 wild type protein, or the p.A518T and p.D543A (LOF) variants.  
277 Cells were stimulated with 50 ng/ml or 100 ng/ml TL8-506 agonist for 2 hours (left) and 4 hours (right).  
278 Data are presented after the subtraction of the unstimulated measurements. Statistical significance  
279 between groups was assessed using a two-way ANOVA multiple comparison test. Data represent  
280 mean  $\pm$  SEM of  $n = 4$  experiments (n.d., not detectable values) (E) HEK BN1 transfected with wild type  
281 TLR8, and TLR8 variants p.A518T, p.F494L (GOF), p.G572V (GOF) and p.D543A (LOF) and  
282 stimulated with the TLR8 agonist TL8-506 at 100 ng/ml for 24 hours. NF- $\kappa$ B activity was quantified  
283 through the secreted embryonic alkaline phosphatase (SEAP) assay. Statistical significance between  
284 groups was assessed using a two-way ANOVA multiple comparison test Data represent mean  $\pm$  SEM of  
285  $n = 3$  experiments run in duplicates. (F) HEK BN1 transfected with wild type TLR8, and TLR8 variants  
286 p.A518T, p.F494L (GOF), p.G572V (GOF) and p.D543A (LOF) and stimulated with the TLR7 agonist  
287 CL097 at 1 $\mu$ g/ml for 24 hours. NF- $\kappa$ B activity was quantified through the secreted embryonic alkaline  
288 phosphatase (SEAP) assay. Statistical significance between groups was assessed using a two-way  
289 ANOVA multiple comparison test Data represent mean  $\pm$  SEM of  $n = 3$  experiments run in  
290 quadruplicates. Differences between groups were considered significant at  $P$  values less than 0.05.

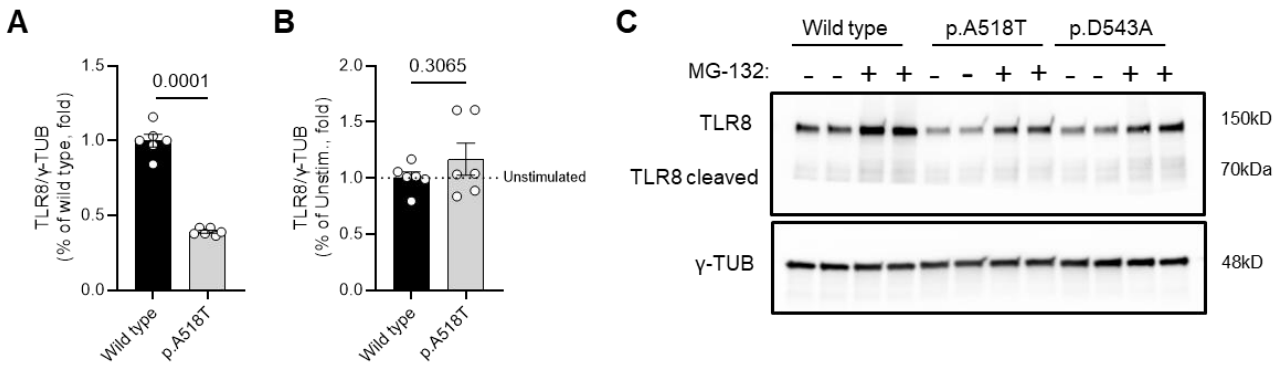

291 **Supplemental Figure 12. Reduced basal and stimulated protein levels of the TLR8 A518T variant**

292 (A) Ratio of TLR8 to  $\gamma$ -TUB in unstimulated BlaER1 *TLR8*<sup>-/-</sup> cells with the insertion of the TLR8 wild  
 293 type protein, or the p.A518T variant. Data are extracted from western blots of Figure 8A. Statistical  
 294 significance between groups was assessed using Student t-test. Data represent mean  $\pm$  SEM of  $n = 6$   
 295 experiments. (B) Ratio of TLR8 to  $\gamma$ -TUB in stimulated with 100 ng/ml TL8-506 agonist for 15 minutes  
 296 of BlaER1 *TLR8*<sup>-/-</sup> cells with the insertion of the TLR8 wild type protein, or the p.A518T variant. Data  
 297 are extracted from western blots of Figure 8A. Data are presented as fold change relative to each  
 298 respective unstimulated condition, which is represented by the dashed line and equals 1. Statistical  
 299 significance between groups was assessed using Student t-test. Data represent mean  $\pm$  SEM of  $n = 6$   
 300 experiments. (C) Western blot against TLR8 and  $\gamma$ -TUB in BlaER1 *TLR8*<sup>-/-</sup> cells with the insertion of  
 301 the TLR8 wild type, or the p.A518T variant, and the previously published p.D543A (LOF) TLR8  
 302 variant. Cells were stimulated with 10  $\mu$ M MG132 proteasomal inhibitor for 6 hours. Differences  
 303 between groups were considered significant at  $P$  values less than 0.05.

304 **Supplemental Tables**305 **Supplemental Table 1. The CADD score**

|                 |          |
|-----------------|----------|
| <b>Chrom</b>    | <b>X</b> |
| <b>Pos</b>      | 12920592 |
| <b>Ref</b>      | G        |
| <b>Alt</b>      | A        |
| <b>RawScore</b> | 2.018455 |
| <b>PHRED</b>    | 19.83    |

306

307 **Supplemental Table 2. List of flow cytometry antibodies for multiparametric immunophenotyping**

| <b>Company</b>        | <b>Catalog Number</b> | <b>Fluorochrome</b>                   | <b>Marker</b>                         | <b>Isotype</b>           | <b>Clone</b> |
|-----------------------|-----------------------|---------------------------------------|---------------------------------------|--------------------------|--------------|
| <b>BD Biosciences</b> | 612940                | <b>BUV496</b>                         | <b>CD3</b>                            | Mouse BALB/c IgG1, κ     | UCHT1        |
|                       | 567345                | <b>R718</b>                           | <b>CD8</b>                            | Mouse IgG1, κ            | HIT8a        |
|                       | 741358                | <b>BUV563</b>                         | <b>CD11c</b>                          | Mouse BALB/c IgG1, κ     | B-ly6        |
|                       | 751323                | <b>BUV615</b>                         | <b>CD16</b>                           | Mouse BALB/c IgG1, κ     | B73.1        |
|                       | 612848                | <b>BUV737</b>                         | <b>CD20</b>                           | Mouse C57BL/6 IgG2b, κ   | 2H7          |
|                       | 750167                | <b>BUV661</b>                         | <b>CD27</b>                           | Mouse BALB/c IgG1        | L128         |
|                       | 560677                | <b>PE-Cy7</b>                         | <b>CD38</b>                           | Mouse IgG1, κ            | HIT2         |
|                       | 562298                | <b>PE-CF594</b>                       | <b>CD45RA</b>                         | Mouse IgG2b, κ           | HI100        |
|                       | 744223                | <b>BUV395</b>                         | <b>CD56</b>                           | Mouse IgG1, κ            | R19-760      |
|                       | 747111                | <b>BV750</b>                          | <b>CXCR5 (CD185)</b>                  | Rat IgG2b, κ             | RF8B2        |
| <b>BioLegend</b>      | 331510                | <b>Alexa Fluor 647</b>                | <b>CD1c</b>                           | Mouse IgG1, κ            | L161         |
|                       | 300436                | <b>BV570</b>                          | <b>CD3</b>                            | Mouse IgG1, κ            | UCHT1        |
|                       | 300554                | <b>BV785</b>                          | <b>CD4</b>                            | Mouse IgG1, κ            | RPA-T4       |
|                       | 367156                | <b>APC/Fire 810</b>                   | <b>CD14</b>                           | Mouse IgG1, κ            | 63D3         |
|                       | 363026                | <b>BV650</b>                          | <b>CD19</b>                           | Mouse IgG1, κ            | SJ25C1       |
|                       | 368506                | <b>PerCP</b>                          | <b>CD45</b>                           | Mouse IgG1, κ            | HI30         |
|                       | 306030                | <b>BV711</b>                          | <b>CD123</b>                          | Mouse IgG1, κ            | 6H6          |
|                       | 344114                | <b>BV421</b>                          | <b>CD141</b>                          | Mouse IgG1, κ            | M80          |
|                       | 310826                | <b>BV605</b>                          | <b>CD40L (CD154)</b>                  | Mouse IgG1, κ            | 24-31        |
|                       | 329972                | <b>PE-Cy5</b>                         | <b>PD-1 (CD279)</b>                   | Mouse IgG1, κ            | EH12.2H7     |
|                       | 367425                | <b>BV605</b>                          | <b>PD-1 (CD279)</b>                   | Mouse IgG1, κ            | NAT105       |
|                       | 395504                | <b>PE</b>                             | <b>TLR8 (CD288)</b>                   | Mouse IgG2a, κ           | S16018A      |
|                       | 307640                | <b>BV605</b>                          | <b>HLA-DR</b>                         | Mouse IgG2a, κ           | L243         |
|                       | 348220                | <b>BV510</b>                          | <b>IgD</b>                            | Mouse IgG2a, κ           | IA6-2        |
|                       | <b>Cell signaling</b> | 4886S                                 | <b>Alexa Fluor 488</b>                | <b>pNFκBp65 (Ser536)</b> | Rabbit IgG   |
| <b>Invitrogen</b>     | L34976A               | <b>LIVE/DEAD Fixable Near-IR Dead</b> | <b>LIVE/DEAD Fixable Near-IR Dead</b> |                          |              |

|                        |             |            |                     |                        |        |
|------------------------|-------------|------------|---------------------|------------------------|--------|
| <b>Miltenyi Biotec</b> | 130-100-719 | <b>APC</b> | <b>CD278 (ICOS)</b> | Recombinant human IgG1 | REA192 |
|------------------------|-------------|------------|---------------------|------------------------|--------|

308

309 **Supplemental Table 3. List of gene expression primer sequences**

| <b>Gene symbol</b> | <b>Forward primer</b>  | <b>Reverse primer</b>  |
|--------------------|------------------------|------------------------|
| <i>HERC5</i>       | TGCACTCTCAAAGGTGGTG    | CCAGGCCTAGTTGTCCACAT   |
| <i>IFI6</i>        | AGGATGAGGAGTAGCCAGCA   | TTGGGAGGTTGAGACAGGAG   |
| <i>IFI44</i>       | AGCCTGTGAGGTCCAAGCTA   | ATCTGCAGCCCATAGCATTTC  |
| <i>IFI44L</i>      | TATGTGTGTTGGCTGGGAGA   | GGGCCTGCATACCTCATAGA   |
| <i>IFITM3</i>      | TCGCCTACTCCGTGAAGTCT   | CATAGGCCTGGAAGATCAGC   |
| <i>IFIT1</i>       | GGCAAACCAACCGTCTCTA    | TTTGAGATGGGGTCTCGTTC   |
| <i>IFIT3</i>       | GAACATGCTGACCAAGCAGA   | CAGTTGTGTCCACCCTTCT    |
| <i>ISG15</i>       | GAGAGGCAGCGAACTCATCT   | CTTCAGCTCTGACACCGACA   |
| <i>MX1</i>         | GCCACAAGGCACCTAAGTC    | ATTCTCAAACCTGCGCTCT    |
| <i>MX2</i>         | AAGCAGTATCGAGGCAAGGA   | TCGTGCTCTGAACAGTTTGG   |
| <i>OAS1</i>        | GAGCTCCTGACGGTCTATGC   | GTTTCGTGAGCTGCCTTCTC   |
| <i>OAS2</i>        | GCTCCTATGGACGGAAAACA   | TGAACCCATCAAGGGACTTC   |
| <i>OAS3</i>        | GACCTAAGGGATGGCTGTGA   | CAGGAAACTGAAGGCTCAGG   |
| <i>PLSCR1</i>      | GGTTTACTTTGCAGCGGAAG   | ACCAGGAGGAGCTTGGATTT   |
| <i>STAT1</i>       | CCGTTTTTCATGACCTCCTGT  | TGAATATTCCCCGACTGAGC   |
| <i>IRF5</i>        | GGGACTGATGTGGAGATGTG   | CTCTCCTTCTGGCCAAAT     |
| <i>IRF7</i>        | TACCATCTACCTGGGCTTCG   | AGGGTTCCAGCTTCACAG     |
| <i>IL6</i>         | TGCAATAACCACCCCTGACC   | TGCGCAGAATGAGATGAGTTG  |
| <i>TNF</i>         | CTCTTCTGCCTGCTGCACTTTG | ATGGGCTACAGGCTTGTCACTC |
| <i>TLR8</i>        | CTGTGAGTTATGCCCGAAGA   | TGGTGCTGTACATTGGGGTTG  |
| <i>RELA</i>        | TGAACCGAAACTCTGGCAGCTG | CATCAGCTTGCGAAAAGGAGCC |
| <i>GAPDH</i>       | CGGAGTCAACGGATTTGG     | TGATGACAAGCTTCCCGTTC   |

310
